# Supplementary material for: Do enlarged hind legs of male thick-legged flower beetles contribute to take-off or mating?
Source: Oxford University Press journal article supplement (doi:10.1242/jeb.212670), 2019-01-01
Supplement: jeb212670supp.pdf [file jeb212670supp.pdf]

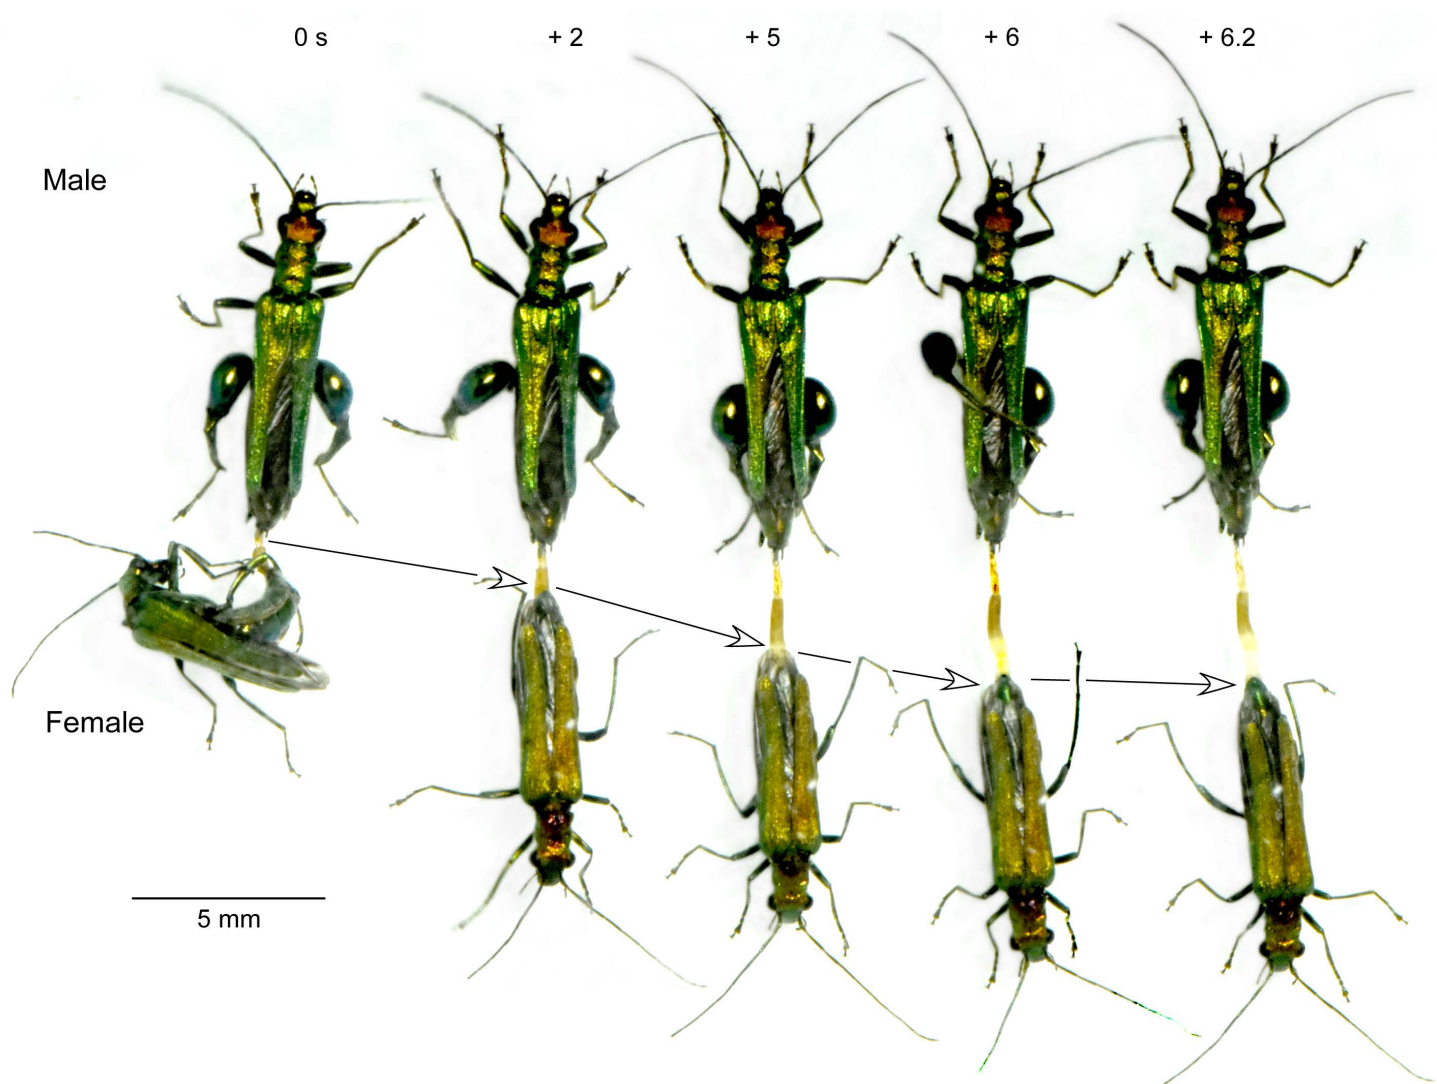

**Fig. S1 . Disengagement after mating.** Sequence of still images taken with a Nikon D7200 camera from the start (time = 0 ms) of disengagement after mating on a vertical surface. The images are arranged from left to right. As the male (top) and female (bottom) gradually separate, the genitalia of both are progressively extended.

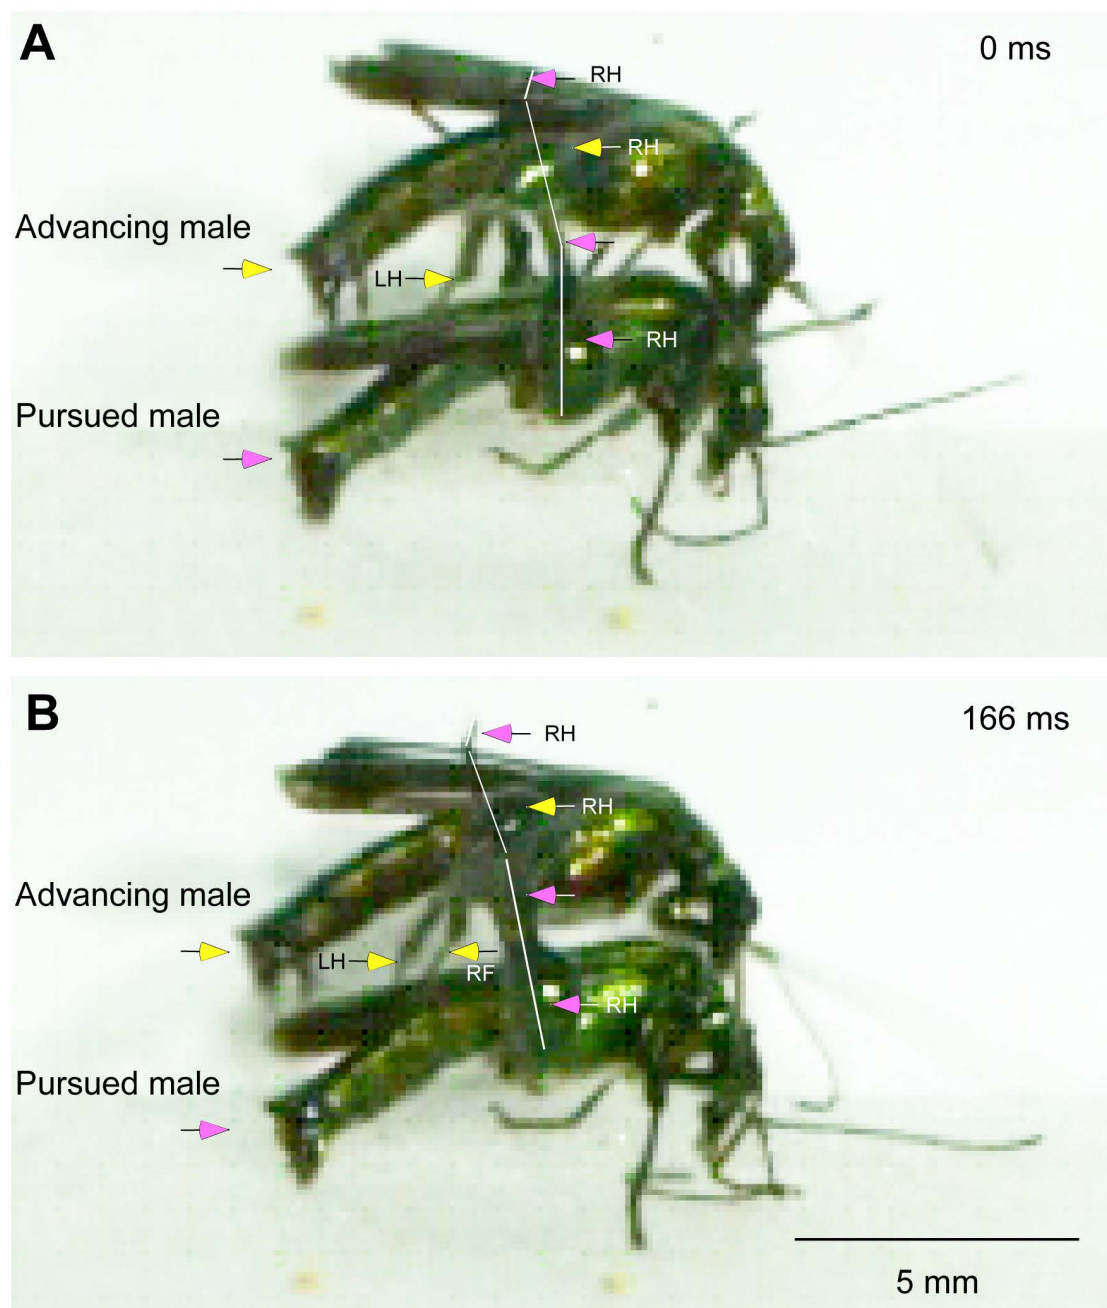

**Fig. S2. Male to male interactions.** (A, B) Two images separated in time by 166 ms from a video of an advancing male (yellow arrow heads) mounting a pursued male (pink arrow heads) but meeting resistance from his extended hind legs (white lines).

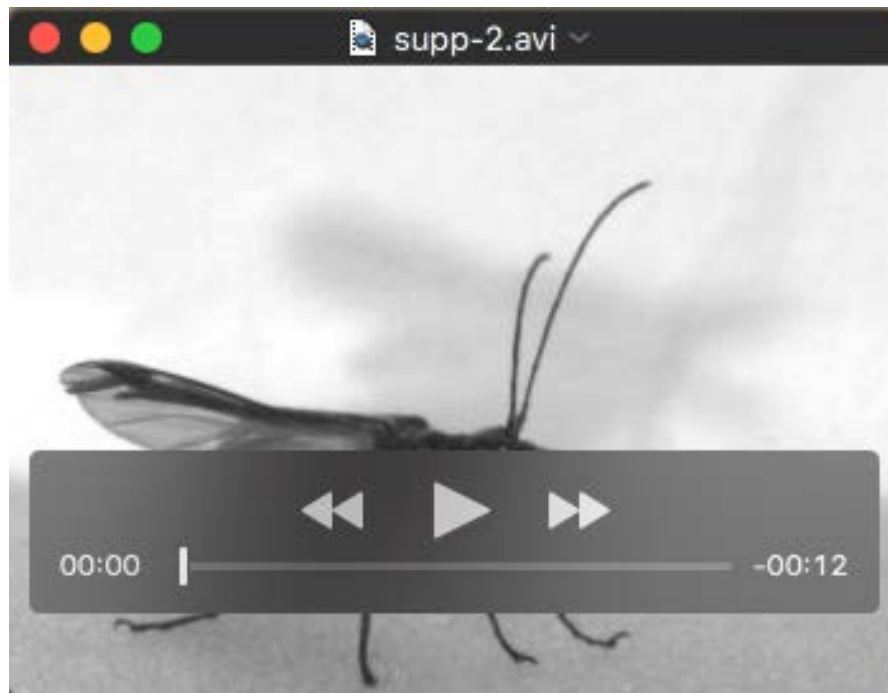

**Movie 1.** High speed movie with images captured at  $1000\text{ s}^{-1}$  and replayed at  $10\text{ s}^{-1}$  of a male *O. nobilis* taking-off as viewed from the side.

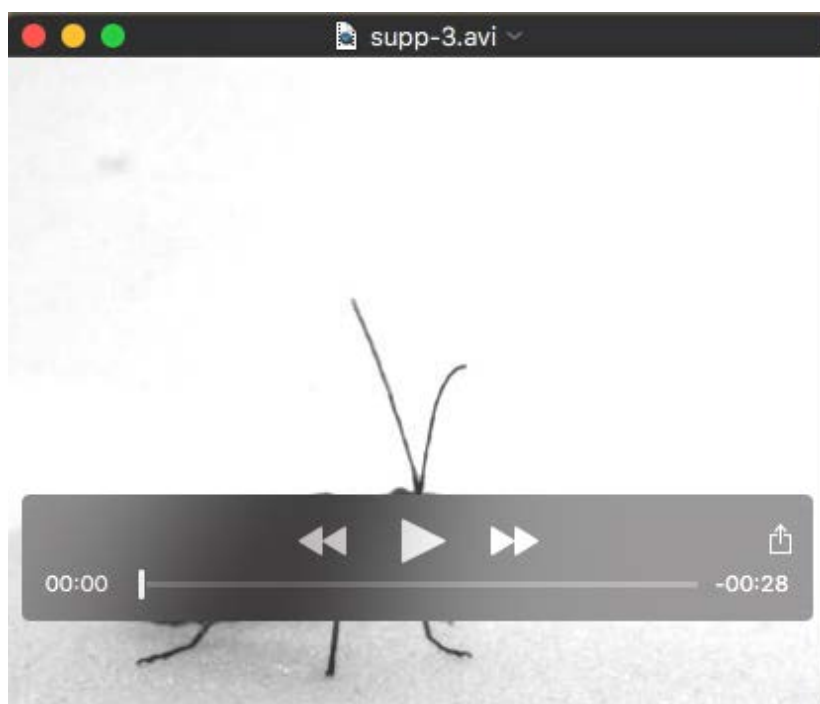

**Movie 2.** High speed movie with images captured at  $1000\text{ s}^{-1}$  and replayed at  $10\text{ s}^{-1}$  of a female *O. nobilis* taking-off as viewed from the side.

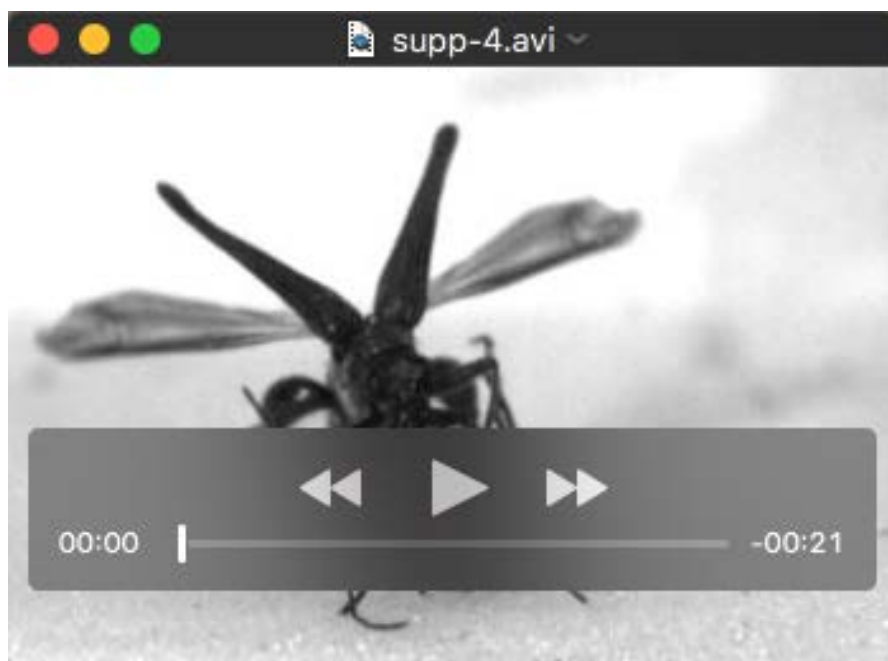

**Movie 3.** Video captured at 250 frames  $s^{-1}$  and replayed at 30  $s^{-1}$  of a male mounting a female and grasping her with his enlarged hind legs during mating.
